# Supplementary material
Source: Springer Nature journal article supplement (https://www.springermedizin.de/resource/supplementary/13045_2013_399_MOESM1_ESM.pdf/9661294)
Supplement: MOESM1 [file 9661294]

n= 27 eligible participants

n=27 consented

Missing data

2 scheduled for stem cell transplant

3 status change for multiple myeloma

2 scheduling/travel conflicts

1 did not complete all baseline/follow-up assessments

n=19 analyzed for primary outcomes
